# Supplementary material for: Dissolution of wood in α-keto acid and aldehydic carboxylic acids and fractionation at room temperature
Source: Royal Society of Chemistry journal article supplement (doi:10.1039/c4gc00504j), 2014-01-01
Supplement: c4gc00504j1.pdf [file c4gc00504j1.pdf]

ARTICLE

**Table 1** Pyrolysis products identified in each fraction isolated by 2-MeTHF/water fractionation at room temperature

| no. | RT <sup>a</sup> (min) | MW <sup>b</sup> | compounds                              | Origin <sup>c</sup> | Area (%)      |       |       |                  |       |       |             |
|-----|-----------------------|-----------------|----------------------------------------|---------------------|---------------|-------|-------|------------------|-------|-------|-------------|
|     |                       |                 |                                        |                     | No. 1 (1 day) |       |       | No. 2 (8 months) |       |       | milled wood |
|     |                       |                 |                                        |                     | Fr. 1         | Fr. 2 | Fr. 3 | Fr. 1            | Fr. 2 | Fr. 3 |             |
| 1   | 1.71                  | 60              | Acetic acid                            | C                   | 3.3           | 52.2  | 11.1  | 21.5             | 53.2  | 24.2  | 15.4        |
| 2   | 4.97                  | 96              | Furfural                               | C                   | 1.0           | 2.4   | 1.6   | 0.0              | 9.5   | 8.0   | 1.5         |
| 3   | 5.75                  | 98              | Furfuryl alcohol                       | C                   | 0.0           | 0.7   | 0.0   | 1.3              | 3.9   | 0.7   | 0.6         |
| 4   | 6.19                  | 116             | 1-Acetoxypropan-2-one                  | C                   | 0.0           | 0.9   | 0.0   | 0.0              | 1.5   | 0.0   | 0.0         |
| 5   | 7.68                  | 84              | 2(5H)-Furanone                         | C                   | 0.0           | 0.8   | 0.0   | 1.3              | 2.5   | 0.0   | 0.6         |
| 6   | 8.01                  | 98              | 1,2-Cyclopentanedione                  | C                   | 0.6           | 1.4   | 0.0   | 1.4              | 0.9   | 0.0   | 0.6         |
| 7   | 9.71                  | 110             | 5-Methyl-2-furfural                    | C                   | 0.1           | 0.0   | 0.0   | 0.0              | 0.0   | 0.0   | 0.0         |
| 8   | 10.96                 | 112             | 5,6-Dihydropyran-2,5-dione             | C                   | 0.0           | 1.2   | 0.0   | 1.3              | 0.0   | 0.0   | 0.0         |
| 9   | 11.36                 | 114             | 4-Hydroxy-5,6-dihydro-(2H)-pyran-2-one | C                   | 0.9           | 2.0   | 0.0   | 0.0              | 0.0   | 1.8   | 2.8         |
| 10  | 12.30                 | 112             | Cyclotene/Maple lactone                | C                   | 0.3           | 0.9   | 0.0   | 0.0              | 1.9   | 0.0   | 0.5         |
| 11  | 14.77                 | 124             | Guaiacol                               | G                   | 0.0           | 0.9   | 2.1   | 0.0              | 1.0   | 1.3   | 0.5         |
| 12  | 14.79                 | 128             | Dihydromaltol                          | C                   | 0.4           | 0.0   | 0.0   | 0.0              | 0.0   | 0.0   | 0.0         |
| 13  | 18.89                 | 138             | 4-Methyl Guaiacol                      | G                   | 0.0           | 0.0   | 1.3   | 0.0              | 0.0   | 1.1   | 1.0         |
| 14  | 19.93                 |                 | Anhydrosugar                           | C                   | 0.3           | 0.0   | 0.0   | 0.0              | 0.0   | 0.0   | 0.4         |
| 15  | 20.57                 | 126             | 5-Hydroxymethylfurfural(HMF)           | C                   | 1.9           | 0.0   | 0.0   | 0.0              | 0.0   | 0.0   | 1.0         |
| 16  | 21.43                 | 140             | 3-Methoxycatechol                      | UL                  | 0.2           | 0.0   | 1.5   | 0.0              | 0.0   | 2.5   | 0.7         |
| 17  | 21.64                 | 124             | 4-Methylcatechol                       | UL                  | 0.0           | 0.0   | 0.0   | 0.0              | 0.0   | 0.0   | 0.1         |
| 18  | 22.11                 | 152             | 4-Ethylguaiacol                        | G                   | 0.0           | 0.0   | 0.6   | 0.0              | 0.0   | 0.0   | 0.0         |
| 19  | 23.25                 |                 | Anhydrosugar                           | C                   | 1.0           | 0.0   | 0.0   | 8.1              | 0.0   | 0.0   | 1.3         |
| 20  | 23.43                 | 150             | 4-Vinylguaiacol                        | G                   | 0.2           | 0.7   | 1.9   | 0.0              | 0.0   | 0.0   | 1.0         |
| 21  | 24.71                 | 154             | Syringol (1,3-dimethylpyrogallate)     | S                   | 0.9           | 4.4   | 9.6   | 0.0              | 5.0   | 6.2   | 2.3         |
| 22  | 24.79                 | 164             | Eugenol                                | G                   | 0.0           | 0.0   | 0.0   | 0.0              | 0.0   | 0.0   | 0.1         |
| 23  | 26.45                 | 152             | Vanillin                               | G                   | 0.0           | 0.0   | 1.1   | 0.0              | 0.0   | 1.0   | 0.3         |
| 24  | 26.71                 | 164             | cis-Isoeugenol                         | G                   | 0.0           | 0.0   | 0.0   | 0.0              | 0.0   | 0.0   | 0.1         |
| 25  | 28.00                 | 168             | 4-Methylsyringol                       | S                   | 0.9           | 0.8   | 6.8   | 0.0              | 0.0   | 4.9   | 2.0         |
| 26  | 28.17                 | 164             | trans-Isoeugenol                       | G                   | 0.2           | 0.0   | 0.0   | 0.0              | 0.0   | 0.0   | 0.5         |
| 27  | 28.38                 | 166             | Homovanillin                           | G                   | 0.0           | 0.0   | 0.0   | 0.0              | 0.0   | 0.0   | 0.1         |
| 28  | 29.08                 | 162             | Guaiacol derivative (G-C3H3)           | G                   | 0.0           | 0.0   | 0.0   | 0.0              | 0.0   | 0.0   | 0.0         |
| 29  | 29.32                 | 166             | Acetovanillone                         | G                   | 0.0           | 0.0   | 0.0   | 0.0              | 0.0   | 0.0   | 0.1         |
|     | 29.95                 | 220             | BHT                                    | *                   | 0.0           | 0.0   | 0.0   | 0.0              | 0.0   | *     | 0.0         |
| 30  | 29.90                 | 162             | Levoglucofan                           | C                   | 74.6          | 2.7   | 0.0   | 65.1             | 6.4   | 12.1  | 44.6        |
| 31  | 30.38                 |                 | Anhydrosugar                           | C                   | 1.9           | 0.0   | 0.0   | 0.0              | 0.0   | 0.0   | 0.0         |
| 32  | 30.47                 | 182             | 4-Ethylsyringol                        | S                   | 0.0           | 0.0   | 1.6   | 0.0              | 0.0   | 1.3   | 0.4         |
| 33  | 31.58                 | 196             | Unknown                                |                     | 0.0           | 0.0   | 5.7   | 0.0              | 0.0   | 0.0   | 0.0         |
| 34  | 31.73                 | 180             | 4-Vinylsyringol                        | S                   | 0.4           | 0.0   | 8.0   | 0.0              | 0.8   | 3.0   | 3.8         |
| 35  | 31.81                 | 178             | Guaiacyl vinyl ketone                  | G                   | 0.8           | 2.9   | 2.9   | 0.0              | 0.0   | 0.0   | 0.0         |
|     | 32.58                 | 222             | Diethyl phthalate                      | *                   | 0.0           | 0.0   | 0.0   | *                | 0.0   | 0.0   | 0.0         |
| 36  | 32.86                 | 194             | 4-Allyl-syringol                       | S                   | 0.3           | 0.9   | 2.2   | 0.0              | 0.0   | 0.8   | 0.7         |
| 37  | 34.34                 | 194             | cis-4-Propenylsyringol                 | S                   | 0.0           | 0.0   | 0.9   | 0.0              | 0.0   | 0.6   | 0.0         |
| 38  | 34.61                 | 182             | Syringaldehyde                         | S                   | 0.6           | 3.2   | 5.9   | 0.0              | 4.6   | 8.1   | 2.6         |
| 39  | 35.14                 | 192             | Syringol derivative (S-C3H3)           | S                   | 0.0           | 0.0   | 0.0   | 0.0              | 0.0   | 0.4   | 0.2         |
| 40  | 35.34                 | 192             | Syringol derivative (S-C3H3)           | S                   | 0.0           | 0.0   | 1.0   | 0.0              | 0.0   | 0.2   | 0.2         |
| 41  | 35.87                 | 194             | trans-4-Propenylsyringol               | S                   | 2.3           | 2.6   | 8.0   | 0.0              | 1.0   | 4.8   | 3.9         |
| 42  | 36.10                 |                 | Anhydrosugar                           | C                   | 0.1           | 0.0   | 0.0   | 0.0              | 0.0   | 0.0   | 0.0         |
| 43  | 36.81                 |                 | Anhydrosugar                           | C                   | 3.8           | 0.0   | 0.0   | 0.0              | 0.0   | 0.0   | 0.0         |
| 44  | 36.69                 | 196             | Acetosyringone                         | S                   | 0.2           | 1.0   | 2.2   | 0.0              | 0.7   | 1.7   | 1.1         |
| 45  | 36.86                 | 178             | trans-Coniferaldehyde                  | G                   | 0.0           | 0.0   | 0.0   | 0.0              | 0.0   | 0.0   | 0.2         |
| 46  | 37.00                 | 180             | trans-Coniferyl alcohol                | G                   | 0.0           | 1.4   | 0.0   | 0.0              | 0.0   | 0.0   | 0.1         |
| 47  | 37.67                 | 210             | Syringyl acetone                       | S                   | 0.3           | 1.7   | 0.0   | 0.0              | 3.2   | 4.5   | 0.9         |
| 48  | 37.85                 | 212             | Methyl syringate                       | S                   | 0.0           | 0.0   | 2.6   | 0.0              | 0.0   | 0.3   | 0.0         |
| 49  | 38.99                 | 198             | Syringic acid                          | S                   | 0.0           | 1.1   | 0.0   | 0.0              | 0.0   | 0.0   | 0.9         |
| 50  | 39.41                 | 210             | Unknown                                |                     | 0.0           | 0.0   | 1.3   | 0.0              | 0.0   | 0.0   | 0.0         |
| 51  | 39.23                 | 210             | Propiosyringone                        | S                   | 0.0           | 0.7   | 1.6   | 0.0              | 2.8   | 7.8   | 0.0         |
| 52  | 39.44                 | 208             | Syringyl vinyl ketone                  | S                   | 0.0           | 0.0   | 0.0   | 0.0              | 0.0   | 1.2   | 0.0         |
| 53  | 41.05                 | 212             | dihydrosinapyl alcohol                 | S                   | 0.0           | 0.0   | 0.0   | 0.0              | 0.0   | 0.0   | 0.3         |
| 54  | 41.69                 | 210             | cis-Sinapyl alcohol                    | S                   | 0.0           | 0.7   | 0.0   | 0.0              | 0.0   | 0.0   | 0.7         |
| 55  | 43.41                 | 208             | trans-Synapaldehyde                    | S                   | 0.7           | 3.0   | 4.9   | 0.0              | 0.3   | 1.5   | 3.8         |
| 56  | 43.68                 | 210             | trans-Sinapyl alcohol                  | S                   | 0.0           | 6.9   | 0.0   | 0.0              | 0.2   | 0.0   | 0.0         |

|    |       |     |                                         |    |     |     |     |     |     |     |     |
|----|-------|-----|-----------------------------------------|----|-----|-----|-----|-----|-----|-----|-----|
| 57 | 58.14 | 272 | 1,2-Diguaiacylethylene                  | GG | 0.0 | 0.0 | 1.5 | 0.0 | 0.0 | 0.0 | 0.8 |
| 58 | 59.76 | 320 | 4,4'-Methylenebis(2, 6-dimethoxyphenol) | SS | 0.0 | 0.0 | 1.0 | 0.0 | 0.0 | 0.0 | 0.0 |
| 59 | 62.96 | 302 | 1-Guaiacyl-2-syringylethylene           | GS | 0.7 | 0.8 | 3.8 | 0.0 | 0.0 | 0.0 | 0.8 |
| 60 | 67.33 | 332 | 1,2-Disyringylethylene                  | SS | 1.0 | 1.0 | 7.4 | 0.0 | 0.4 | 0.0 | 0.8 |

<sup>a</sup>RT: retention time; <sup>b</sup>MW: molecular weight; <sup>c</sup>C: carbohydrate, G: guaiacyl lignin, S: syringyl lignin, UL: non-specific lignin
